# Supplementary material for: Gasdermin D inhibition confers antineutrophil-mediated cardioprotection in acute myocardial infarction
Source: PubMed Central journal article supplement (PMC8718151; doi:10.1172/jci151268), 2022-01-04
Supplement: jci-132-151268-s009.pdf [file jci-132-151268-s009.pdf]

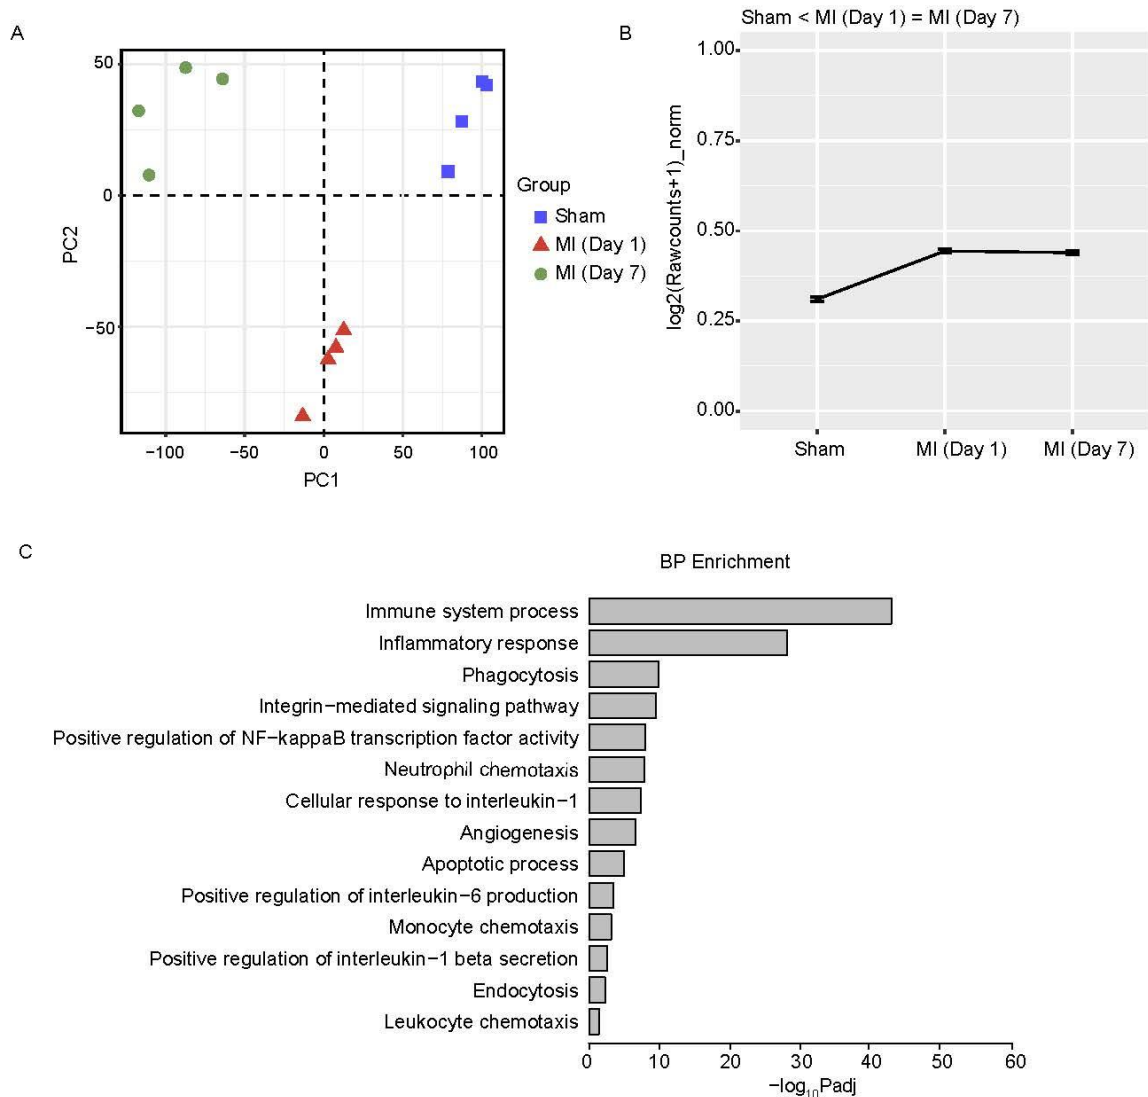

1

2 **Figure S1. Gene expression analysis by RNA-Seq.**

3 (A) The distribution of samples was determined by the 1<sup>st</sup> and 2<sup>nd</sup> principal component generated  
 4 by principal component analysis (PCA). (B) Represented one of the dynamic expression patterns  
 5 of genes across Sham, MI (Day 1) and MI (Day 7), with (C) showing the functional analysis of  
 6 such genes by GO Biological Process based on hypergeometric distribution (the adjusted P-value  
 7 < 0.05).

A

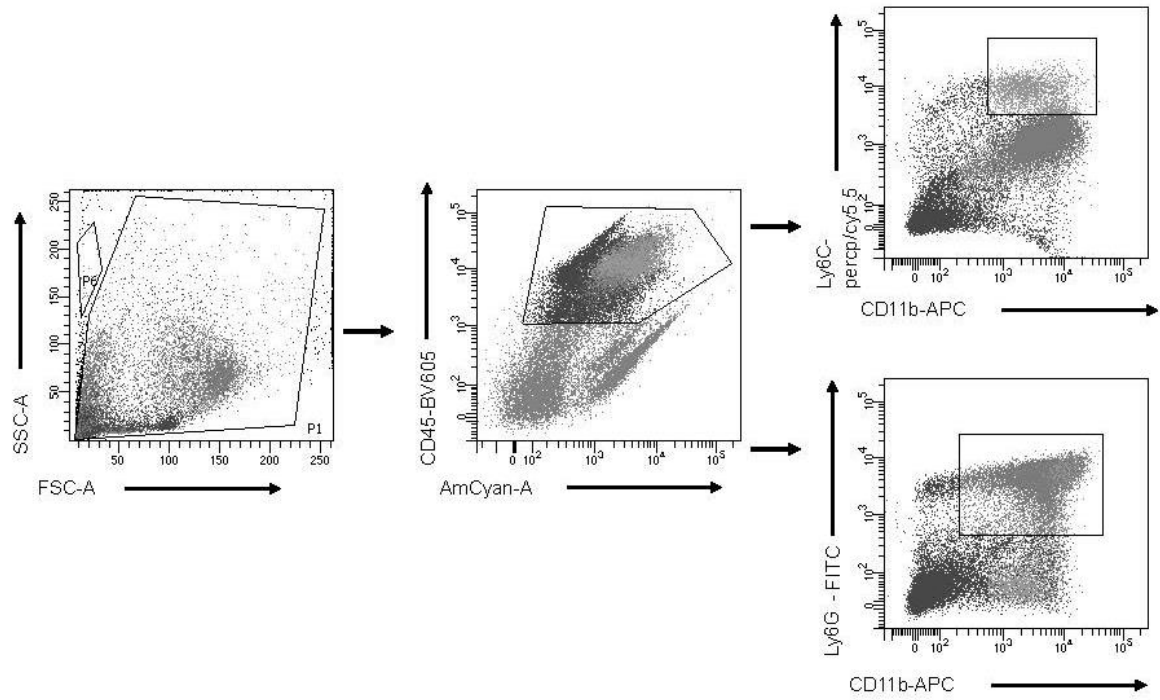

8  
9 **Figure S2. Gating strategy for flow cytometric analysis.**  
10

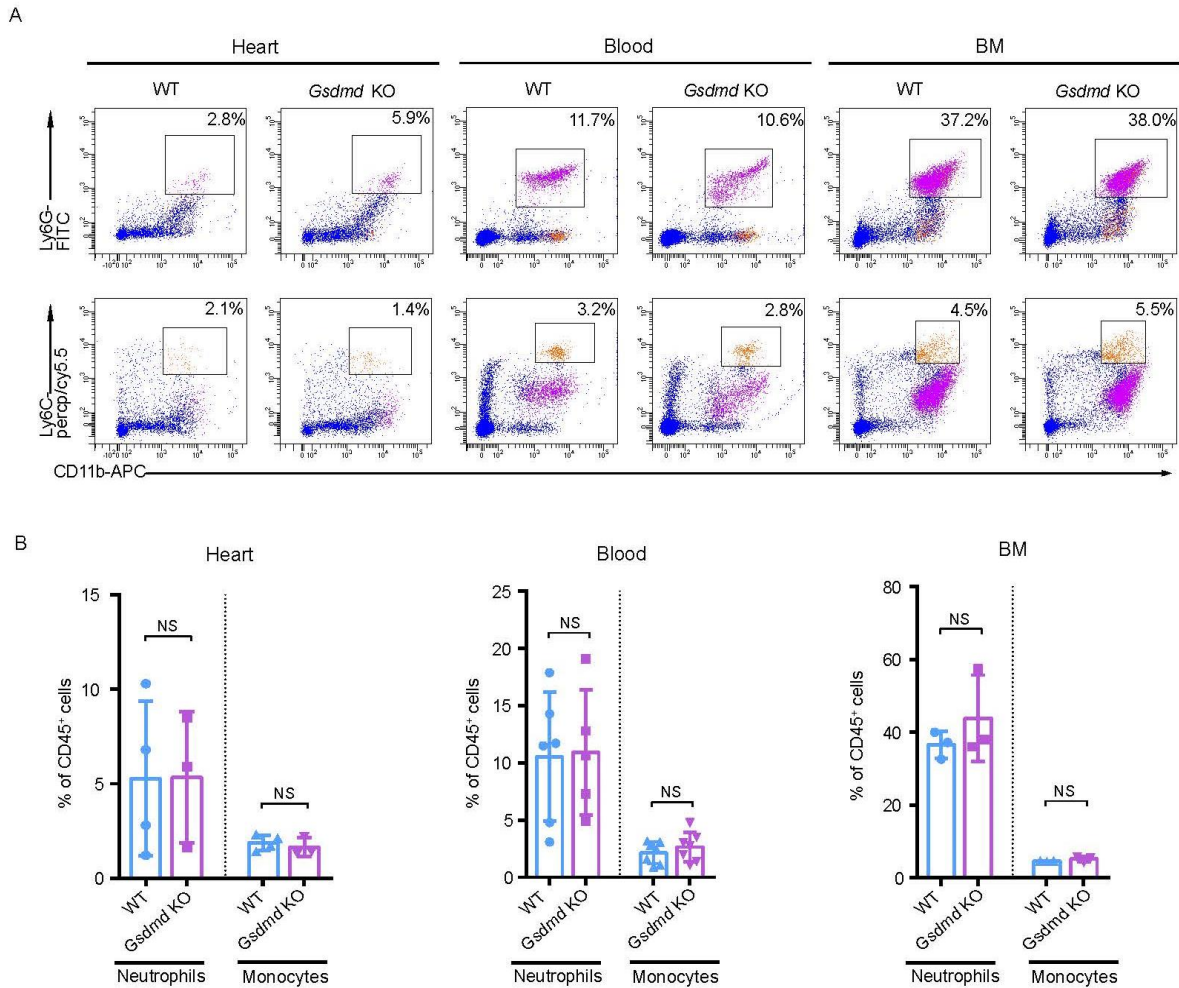

11

12 **Figure S3. The baseline of WT or *Gsdmd*<sup>-/-</sup> mice leukocytes.**

13 Flow cytometric analysis (A) and quantification (B) of Cd11b<sup>+</sup>Ly6G<sup>+</sup> neutrophils and  
 14 Cd11b<sup>+</sup>Ly6C<sup>+</sup> monocytes in blood from WT or *Gsdmd*<sup>-/-</sup> mice at baseline without a MI surgery  
 15 (n= 3-7). Data are mean ±SD and were analyzed by unpaired two-tailed Student's *t* test (B). NS,  
 16 not significant.

17

18

Supplemental Figure 4

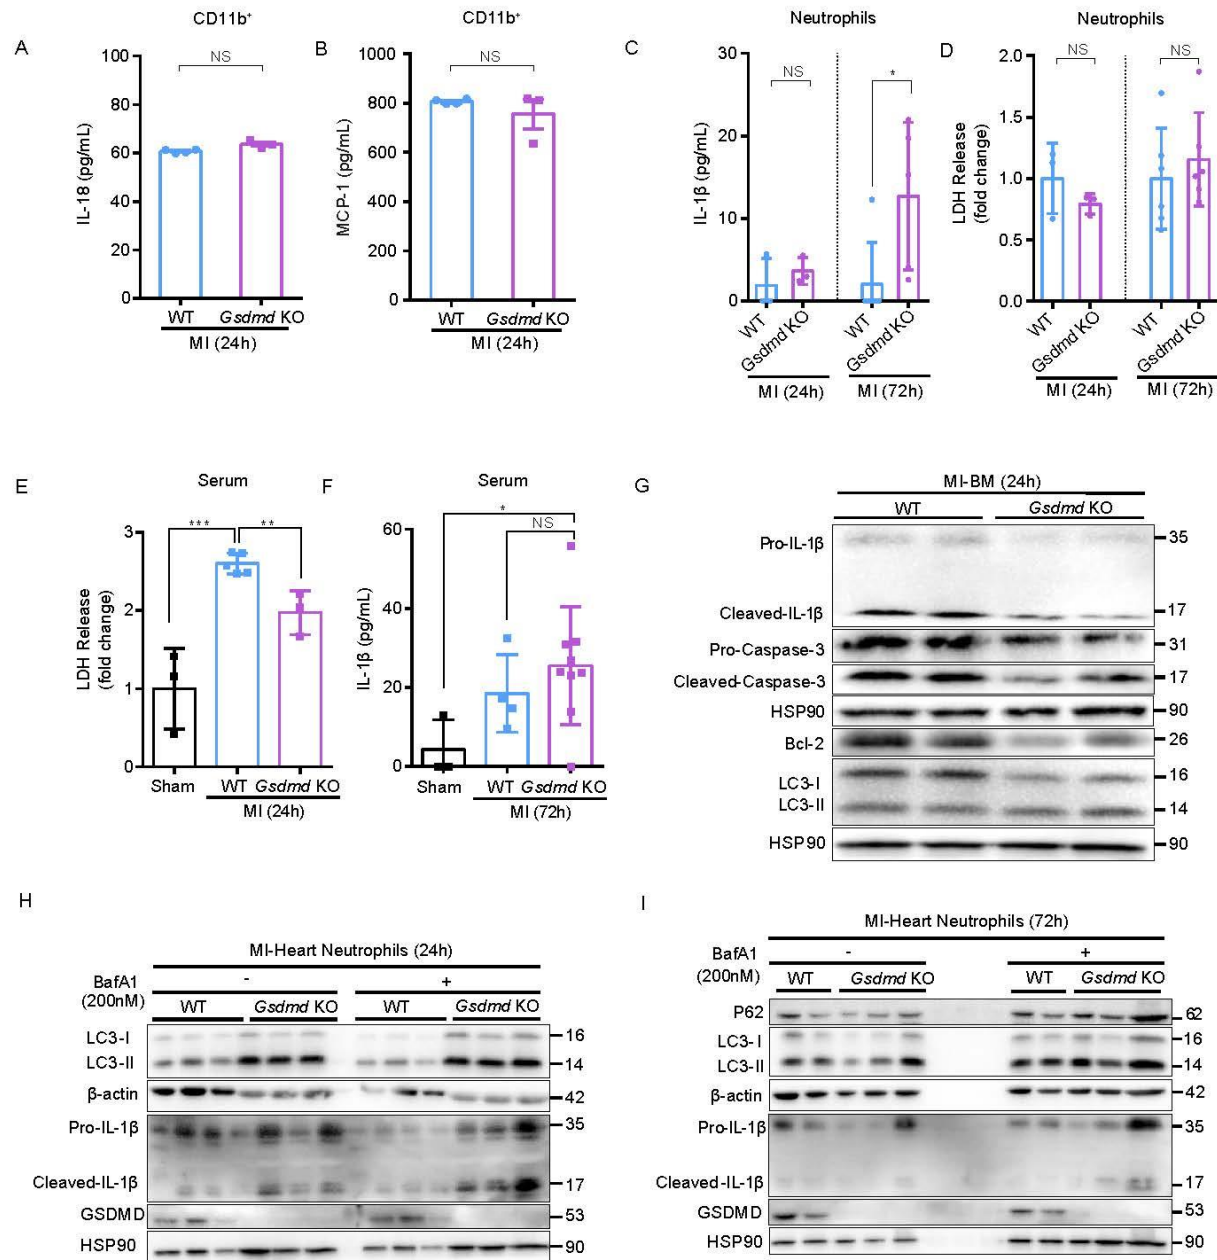

19

20 **Figure S4. Biochemical analysis of myeloid-originated cells from the heart.**

21 **(A-B)** Secretion levels of IL-18 and MCP-1 from myeloid-originated cells from the heart of WT (n  
 22 = 4) or *Gsdmd*<sup>-/-</sup> (n = 3) mice at 24 hours after MI assessed by ELISA. **(C)** Secretion levels of LDH  
 23 from neutrophils (2 $\times$ 10<sup>6</sup>) from the heart of WT or *Gsdmd*<sup>-/-</sup> mice at 24 hours and 72 hours after MI.  
 24 **(D)** Production of IL-1 $\beta$  from neutrophils from the heart of WT or *Gsdmd*<sup>-/-</sup> mice at 24 hours and

25 72 hours after AMI assessed by ELISA. The corresponding n values were indicated in the plot. **(E)**  
26 Serum levels of LDH from WT or *Gsdmd*<sup>-/-</sup> mice at 24 hours after MI or a sham surgery. **(F)**  
27 Serum levels of IL-1 $\beta$  from WT or *Gsdmd*<sup>-/-</sup> mice at 72 hours after MI or a sham surgery. **(G)**  
28 Representative immunoblotting images of protein levels of BM cells from WT or *Gsdmd*<sup>-/-</sup> mice  
29 at 24 hours after MI or a sham surgery (n = 2 per group). **(H-I)** Representative immunoblotting  
30 images of protein levels of neutrophils cells with or without BafA1 (200 nM) from the heart of WT  
31 or *Gsdmd*<sup>-/-</sup> mice at 24 hours or 72 hours after MI (n = 2 - 3 per group). Data represent mean  $\pm$ SD  
32 and were analyzed by unpaired two-tailed Student's *t* test **(A, C and D)** or One-way analysis of  
33 variance followed by Tukey's multiple comparison test **(E)**. NS, not significant; \*,  $P < 0.05$ ; \*\*,  
34  $P < 0.01$ ; \*\*\*,  $P < 0.001$ .

35

36

37

38

39

40

Supplemental Figure 5

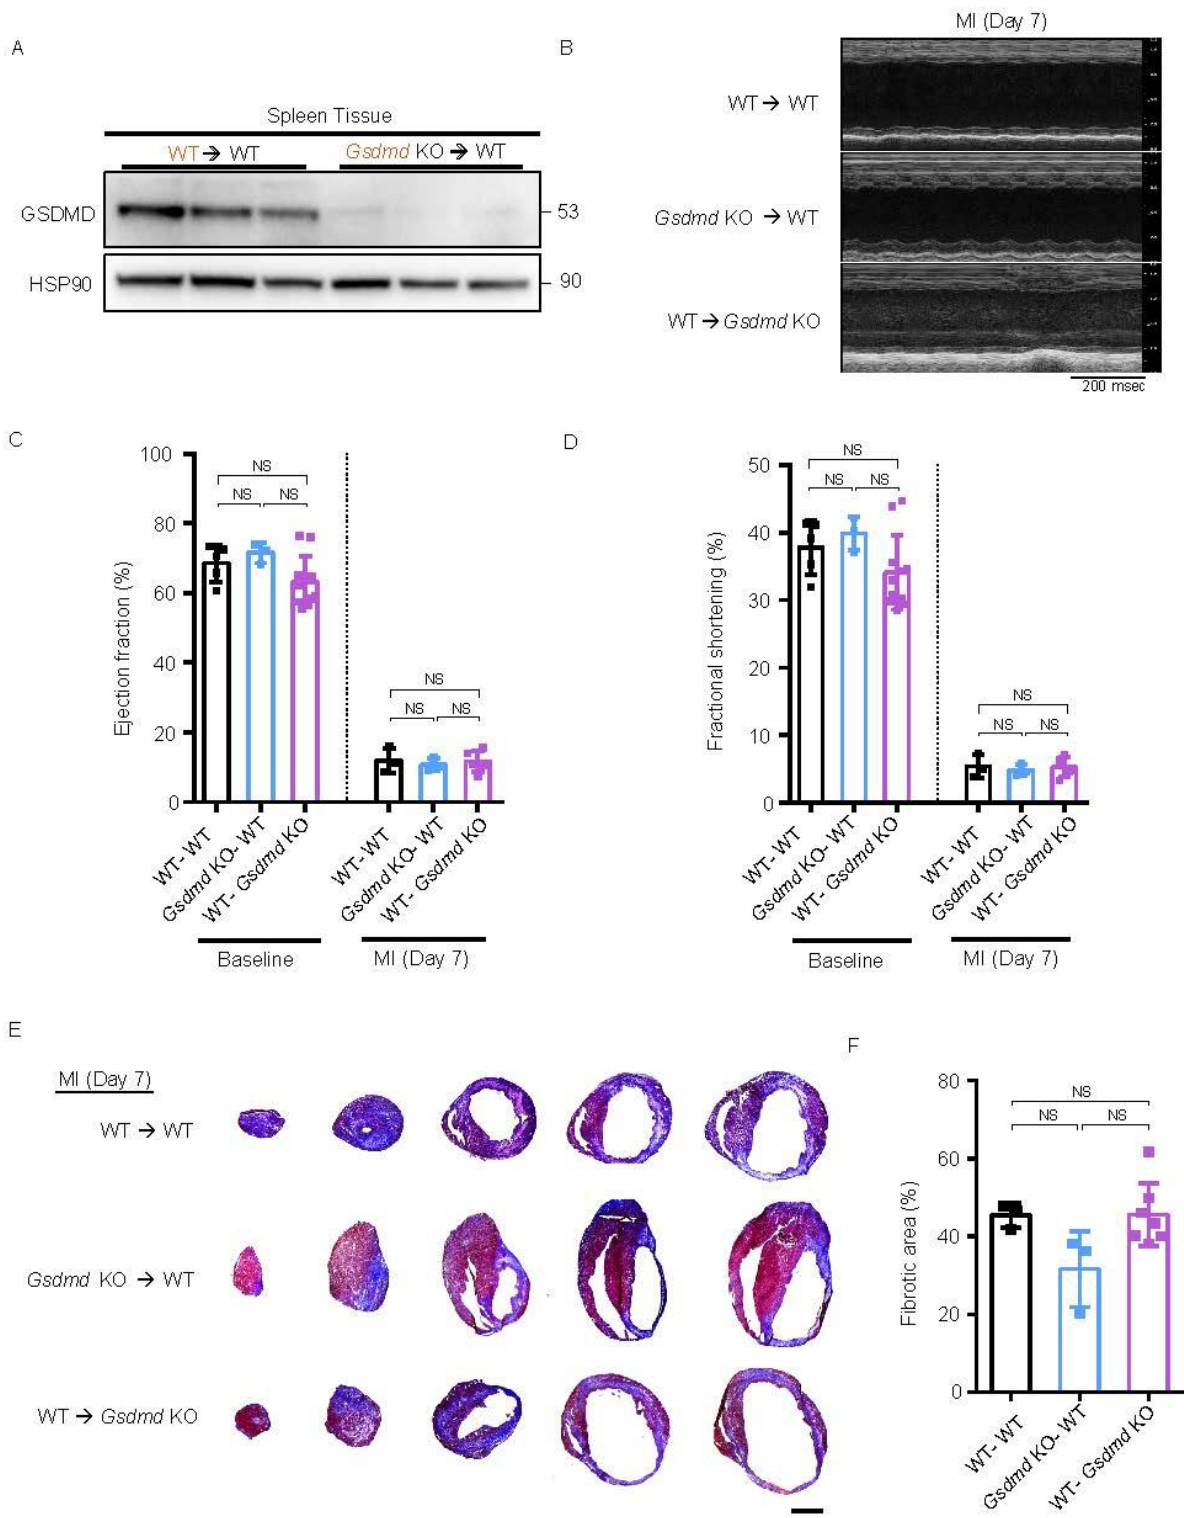

42 **Figure S5. Bone marrow transplantation and functional analysis of mice.**

43 **(A)** Immunoblotting for GSDMD validating the success of BMT experiment. **(B-D)**  
44 Echocardiography images **(B)** and M-mode quantification of ejection fraction **(C)** and fractional  
45 shortening **(D)** for WT or *Gsdmd*<sup>-/-</sup> mice before or at 1 week after MI (baseline: WT → WT, n = 5;  
46 *Gsdmd* KO → WT, n = 3; WT → *Gsdmd* KO, n=11; 1 week: WT → WT, n = 3; *Gsdmd* KO→WT,  
47 n = 3; WT→ *Gsdmd* KO, n=5). **(E-F)** Masson's Trichrome staining **(E)** and quantification **(F)** of  
48 fibrotic area of short-axis heart sections from WT → WT (n = 3), *Gsdmd* KO → WT (n = 3) or  
49 WT→ *Gsdmd* KO (n=7) mice at 1 week after MI (scale bar, 1 mm). Data are mean ±SD and were  
50 analyzed by One-way analysis of variance followed by Tukey's multiple comparison test **(C, D**  
51 **and F)**. NS, not significant.

52

53

54

55

56

57

58

59

60

61

Supplementary Figure 6

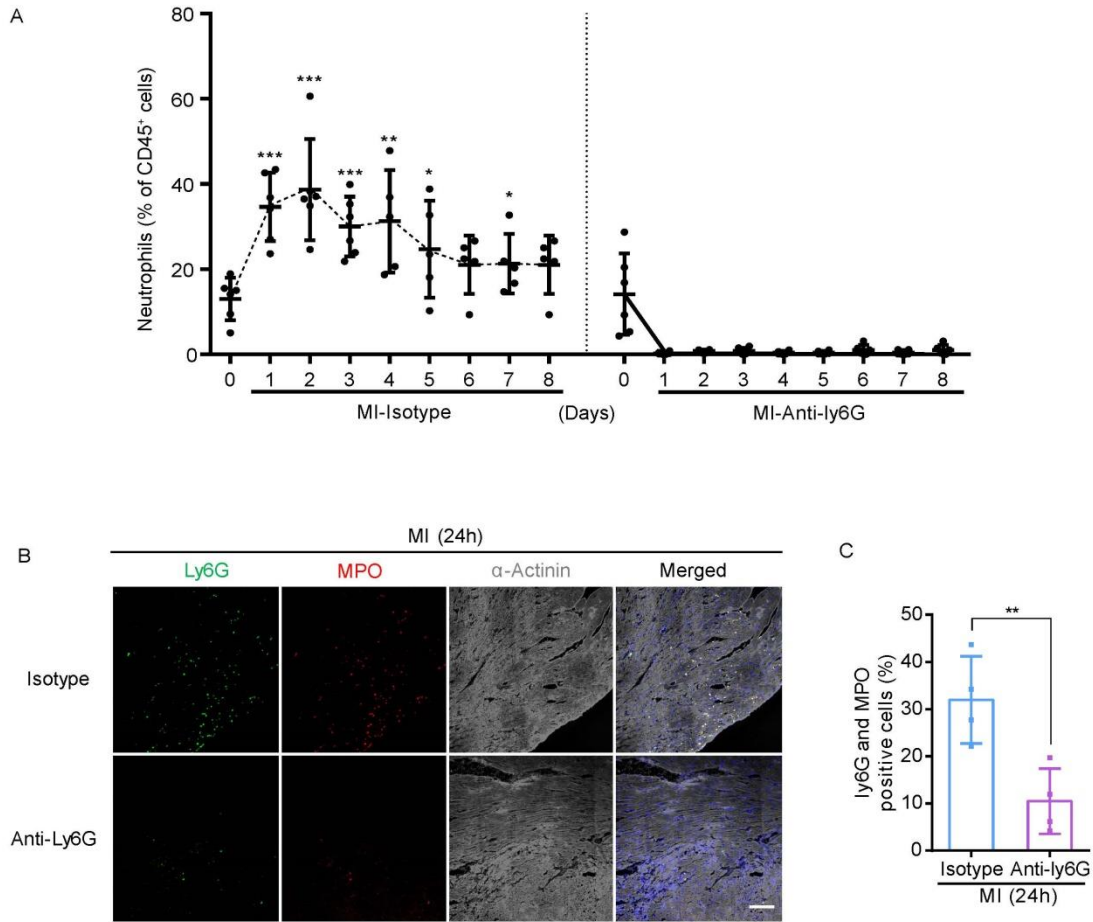

62

63 **Figure S6. Validation of Cd11b<sup>+</sup>Ly6G neutrophils depletion**

64 (A) Flow cytometric quantification of Cd11b<sup>+</sup>Ly6G<sup>+</sup> neutrophils in blood from WT or anti-ly6G  
65 treated mice at different time points. The corresponding n values were indicated in the plot. (B)

66 Immunofluorescence imaging on heart sections from Isotype or Anti-ly6G mice at 24h after MI  
67 showing  $\alpha$ -Actinin (gray), Ly6G (green), MPO (red) and DAPI (blue). Representative fields are

68 presented (scale bar, 100  $\mu$ m). (C) Quantification of Ly6G and MPO positive area proportion in  
69 the field of heart sections from Isotype or Anti-ly6G mice, each value was averaged from the

70 values of 5 fields of view from the same mouse (n = 4 per group). Data represent mean  $\pm$  SD and



71 were analyzed by One-way analysis of variance followed by Tukey's multiple comparison test (A)  
72 or unpaired two-tailed Student's *t* test (C). NS, not significant; \*, P<0.05; \*\*, P<0.01; \*\*\*,  
73 P<0.001; \*\*\*\*, P<0.0001.

74

Supplementary Figure 7

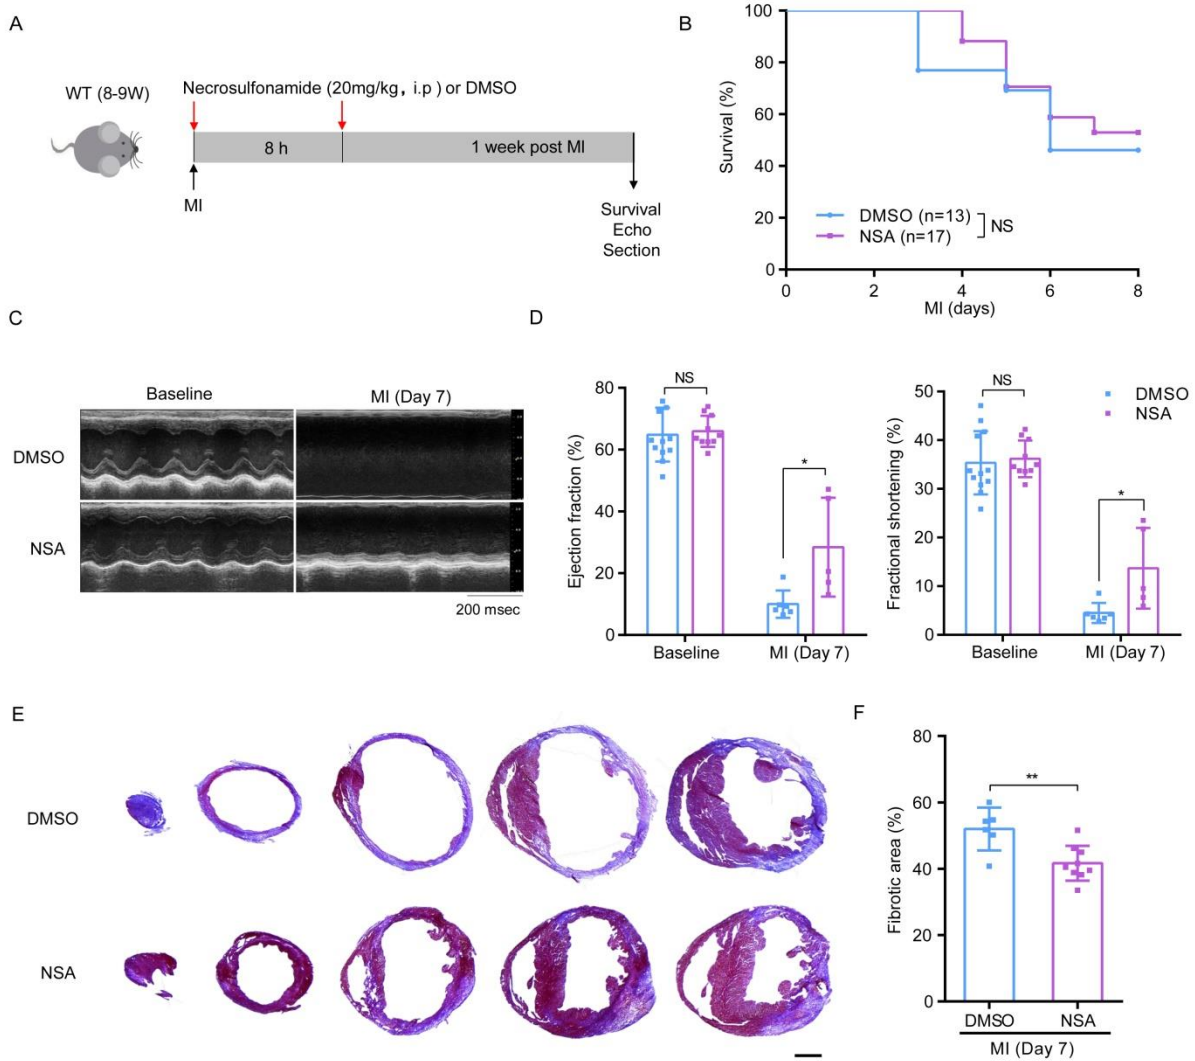

75

76 **Figure S7. Pharmacological inhibition of GSDMD reduces infarct size post MI.**

77 **(A)** Schematic diagram showing the strategy of postoperative NSA administration to the mice. **(B)**

78 Kaplan-Meier survival curves comparing post-MI survival of control (DMSO administration)

79 mice (n = 13) to that of mice administrated with NSA (n = 17). Significance was determined by

80 Mantel-Cox test. **(C-D)** Echocardiography images **(C)** and M-mode quantification **(D)** of ejection

81 fraction (left) and fractional shortening (right) for control mice or mice with NSA administration

82 before or at 1 week after MI. (baseline: DMSO, n = 12; NSA, = 10; 1 week: DMSO, n = 6; NSA, n

83 = 5). **(E-F)** Masson's Trichrome staining **(E)** and quantification of fibrotic area **(F)** of short-axis  
84 heart sections from control mice or mice with NSA administration at 1 week after MI (DMSO, n =  
85 6; NSA, n = 9) (scale bar, 1 mm). Data are mean  $\pm$ SD and were analyzed by One-way analysis of  
86 variance followed by Tukey's multiple comparison test **(D)** or unpaired two-tailed Student's *t* test  
87 **(F)**. NS, not significant; \*,  $P < 0.05$ ; \*\*,  $P < 0.01$ .

88

89 **Supplemental Table 1: Patients' characteristics.**

|                         |                     |
|-------------------------|---------------------|
| <b>Demographics</b>     | <b>n=234</b>        |
| Age (years)             | <b>63.97±11.991</b> |
| Sex (Male/Female)       | <b>41/193</b>       |
| <b>Clinical history</b> |                     |
| Previous PCI, n(%)      | <b>5(2.1)</b>       |
| Previous CABG, n(%)     | <b>0(0)</b>         |
| Previous Stroke, n(%)   | <b>13(5.6)</b>      |
| Hypertension, n(%)      | <b>111(47.4)</b>    |
| Diabetes, n(%)          | <b>41(17.5)</b>     |
| Dyslipidemia, n(%)      | <b>2(0.9)</b>       |
| <b>Medications</b>      |                     |
| β-blockers, n(%)        | <b>176(75.2)</b>    |
| Aspirin, n(%)           | <b>216(92.3)</b>    |
| Statin, n(%)            | <b>215(91.9)</b>    |
| ACEI/ARB, n(%)          | <b>149(63.7)</b>    |
| ADP inhibitors, n(%)    | <b>217(92.7)</b>    |

90

91

92

93

94

95

96

97

98 **Supplemental Table 2: Key Resources and Reagents**

| <b>REAGENT or RESOURCE</b>           | <b>SOURCE</b>                 | <b>IDENTIFIER</b> |
|--------------------------------------|-------------------------------|-------------------|
| Anti-GSDMD                           | Abcam                         | Ab209845          |
| Anti-CD68                            | Abcam                         | Ab53444           |
| Anti-Sarcomeric Alpha Actinin        | Abcam                         | Ab9465            |
| Caspase-1+p10+p20                    | Abcam                         | Ab179515          |
| Anti-mouse Caspase-1                 | Adipogen                      | AG-20B-0042-C100  |
| Anti-mouse IL-1 $\beta$              | R&D Systems                   | AF-401-NA         |
| MPO                                  | R&D Systems                   | AF3667            |
| Bcl-2                                | SantaCruz                     | Sc-7382           |
| Anti-mouse NLRP3                     | Cell Signaling                | 1510S             |
| SQSTM1/P62 Antibody                  | Cell Signaling                | 5114S             |
| LC3 A/B Antibody                     | Cell Signaling                | 4108S             |
| Caspase-3                            | Cell Signaling                | 9662S             |
| HSP90                                | Cell Signaling                | 4877S             |
| $\beta$ -actin                       | Cell Signaling                | 4970S             |
| $\beta$ -tubulin                     | Cell Signaling                | 2146S             |
| GAPDH                                | Cell Signaling                | 3683S             |
| anti-Ly6G/Ly6C antibody              | BioLegend                     | 108436            |
| CD45-BV605                           | BioLegend                     | 103140            |
| CD11b-AlexaFluor647                  | BioLegend                     | 101218            |
| Ly6G-FITC                            | BioLegend                     | 127606            |
| Ly6C-Perp-cy5.5                      | BioLegend                     | 128012            |
| Anti-Ly6G antibody                   | BioLegend                     | 127632            |
| Goat anti-mouse IgG, HRP             | Invitrogen                    | 31430             |
| Goat anti-rabbit IgG, HRP            | Invitrogen                    | 31460             |
| TEXAS-Red goat anti-rat IgG          | Invitrogen                    | T2767             |
| Alexa Fluor 488 goat anti-rat IgG    | Invitrogen                    | A11034            |
| Alexa Fluor 594 goat anti-mouse IgG  | Invitrogen                    | A11032            |
| Alexa Fluor 488 goat anti-rat IgG    | Invitrogen                    | A11006            |
| Alexa Fluor 555 donkey anti-goat IgG | Invitrogen                    | A21432            |
| Alexa Fluor 488 goat anti-mouse IgG  | Invitrogen                    | A11001            |
| Alexa Fluor 647 goat anti-rat IgG    | Invitrogen                    | A21247            |
| CD11b microbeads UltraPure mouse     | Miltenyi                      | 130-126-725       |
| Neutrophil separation kit            | Miltenyi                      | 130-097-658       |
| Mouse chow                           | Changzhou SYSE Bio-Tec.Co.Ltd | PD450J            |
| Bafilomycin A1                       | MCE                           | HY-100558         |

99

100

101

102

103

104
